# Supplementary material
Source: publisher site journal article supplement (https://www.dovepress.com/article/322850)
Supplement: Supplementary file 1 [file get_supplementary_file.php]

## Kwestionariusz Obszarów Problemowych w Cukrzycy

**INSTRUKCJE:** Które z następujących zagadnień w cukrzycy są obecnie dla Pani/Pana problemem? Proszę zakreślić kółkiem liczbę, która najlepiej oddaje Pani/Pana odpowiedź. Proszę udzielić odpowiedzi na każde pytanie.

Imię i nazwisko: .....

Data badania: .....

|     |                                                                                                                   | Nie jest to<br>problem | Jest to<br>niewielki<br>problem | Jest to<br>umiarkowany<br>problem | Jest to dość<br>poważny<br>problem | Jest to<br>poważny<br>problem |
|-----|-------------------------------------------------------------------------------------------------------------------|------------------------|---------------------------------|-----------------------------------|------------------------------------|-------------------------------|
| 1.  | Brak jasnych, skonkretyzowanych celów w leczeniu cukrzycy?                                                        | 0                      | 1                               | 2                                 | 3                                  | 4                             |
| 2.  | Poczucie zniechęcenia do swojego planu leczenia cukrzycy?                                                         | 0                      | 1                               | 2                                 | 3                                  | 4                             |
| 3.  | Poczucie przerażenia na myśl o życiu z cukrzycą?                                                                  | 0                      | 1                               | 2                                 | 3                                  | 4                             |
| 4.  | Krępujące sytuacje społeczne, związane z Pani/Pana opieką diabetologiczną (np. ludzie mówiący Pani/Panu co jeść)? | 0                      | 1                               | 2                                 | 3                                  | 4                             |
| 5.  | Poczucie utraty możliwości jedzenia pewnych potraw?                                                               | 0                      | 1                               | 2                                 | 3                                  | 4                             |
| 6.  | Poczucie przygnębienia na myśl o życiu z cukrzycą?                                                                | 0                      | 1                               | 2                                 | 3                                  | 4                             |
| 7.  | Niepewność, czy Pani/Pana samopoczucie związane jest z cukrzycą czy innym problemem?                              | 0                      | 1                               | 2                                 | 3                                  | 4                             |
| 8.  | Poczucie przytłoczenia przez cukrzycę?                                                                            | 0                      | 1                               | 2                                 | 3                                  | 4                             |
| 9.  | Niepokój o reakcje organizmu na niski poziom cukru we krwi?                                                       | 0                      | 1                               | 2                                 | 3                                  | 4                             |
| 10. | Uczucie złości na myśl o życiu z cukrzycą?                                                                        | 0                      | 1                               | 2                                 | 3                                  | 4                             |
| 11. | Poczucie ciągłego zatroskania o żywność i jedzenie?                                                               | 0                      | 1                               | 2                                 | 3                                  | 4                             |
| 12. | Martwienie się o przyszłość i możliwość poważnych powikłań?                                                       | 0                      | 1                               | 2                                 | 3                                  | 4                             |
| 13. | Uczucia winy lub lęku, kiedy przestaje sobie Pani/Pan radzić z cukrzycą?                                          | 0                      | 1                               | 2                                 | 3                                  | 4                             |
| 14. | Brak pogodzenia się z cukrzycą?                                                                                   | 0                      | 1                               | 2                                 | 3                                  | 4                             |
| 15. | Poczucie niezadowolenia ze swojego lekarza prowadzącego cukrzycę?                                                 | 0                      | 1                               | 2                                 | 3                                  | 4                             |
| 16. | Poczucie, że cukrzyca zabiera Pani/Panu zbyt wiele sił psychicznych i fizycznych każdego dnia?                    | 0                      | 1                               | 2                                 | 3                                  | 4                             |
| 17. | Poczucie osamotnienia w problemie cukrzycy?                                                                       | 0                      | 1                               | 2                                 | 3                                  | 4                             |
| 18. | Poczucie, że Pani/Pana przyjaciele i rodzina nie wspierają Pani/Pana w radzeniu sobie z cukrzycą?                 | 0                      | 1                               | 2                                 | 3                                  | 4                             |
| 19. | Radzenie sobie z powikłaniami cukrzycy?                                                                           | 0                      | 1                               | 2                                 | 3                                  | 4                             |
| 20. | Wyczerpanie (wypalenie) spowodowane ciągłym wysiłkiem potrzebnym do radzenia sobie z cukrzycą?                    | 0                      | 1                               | 2                                 | 3                                  | 4                             |
